# Supplementary material for: Coffee Intake and Colorectal Cancer Incidence According to T-Cell Response
Source: PubMed Central journal article supplement — JNCI Cancer Spectr. 2020 Sep 7;4(6):pkaa068. doi: 10.1093/jncics/pkaa068 (PMC7771005; doi:10.1093/jncics/pkaa068), 2020-09-07
Supplement: pkaa068_supplementary_data.pdf [file pkaa068_supplementary_data.pdf]

Supplementary Table 1. Colorectal cancer cases by intraepithelial and stroma T-cell subset density, according to coffee intake

|                                                               | 0 cups/day<br>(N=76) | <1 cups/day<br>(N=154) | 1-3 cups/day<br>(N=478) | ≥3 cups/ day<br>(N=200) | <i>P</i> * |
|---------------------------------------------------------------|----------------------|------------------------|-------------------------|-------------------------|------------|
| <b>Intraepithelial</b>                                        |                      |                        |                         |                         |            |
| <b>CD3<sup>+</sup>CD4<sup>+</sup>FOXP3<sup>+</sup> cells</b>  |                      |                        |                         |                         |            |
| Low density (n=625)                                           | 48                   | 110                    | 328                     | 139                     | 0.45       |
| Intermediate density (n=142)                                  | 11                   | 18                     | 79                      | 34                      |            |
| High density (n=141)                                          | 17                   | 26                     | 71                      | 27                      |            |
| <b>CD3<sup>+</sup>CD4<sup>+</sup>CD45RO<sup>+</sup> cells</b> |                      |                        |                         |                         |            |
| Low density (n=302)                                           | 28                   | 48                     | 161                     | 65                      | 0.95       |
| Intermediate density (n=305)                                  | 27                   | 51                     | 159                     | 68                      |            |
| High density (n=301)                                          | 21                   | 55                     | 158                     | 67                      |            |
| <b>CD3<sup>+</sup>CD4<sup>+</sup>CD45RO<sup>-</sup> cells</b> |                      |                        |                         |                         |            |
| Low density (n=514)                                           | 41                   | 94                     | 264                     | 115                     | 0.20       |
| Intermediate density (n=197)                                  | 16                   | 21                     | 115                     | 45                      |            |
| High density (n=197)                                          | 19                   | 39                     | 99                      | 40                      |            |
| <b>CD3<sup>+</sup>CD8<sup>+</sup>CD45RO<sup>+</sup> cells</b> |                      |                        |                         |                         |            |
| Low density (n=423)                                           | 37                   | 87                     | 206                     | 93                      | 0.041      |
| Intermediate density (n=242)                                  | 20                   | 25                     | 144                     | 53                      |            |
| High density(n=243)                                           | 19                   | 42                     | 128                     | 54                      |            |
| <b>CD3<sup>+</sup>CD8<sup>+</sup>CD45RO<sup>-</sup> cells</b> |                      |                        |                         |                         |            |
| Low density (n=571)                                           | 43                   | 107                    | 295                     | 126                     | 0.16       |
| Intermediate density (n=168)                                  | 20                   | 28                     | 88                      | 32                      |            |
| High density (n=169)                                          | 13                   | 19                     | 95                      | 42                      |            |
| <b>Stroma</b>                                                 |                      |                        |                         |                         |            |
| <b>CD3<sup>+</sup>CD4<sup>+</sup>FOXP3<sup>+</sup> cells</b>  |                      |                        |                         |                         |            |
| Low density (n=485)                                           | 43                   | 81                     | 253                     | 108                     | 0.81       |
| Intermediate density (n=211)                                  | 14                   | 34                     | 111                     | 52                      |            |
| High density (n=211)                                          | 19                   | 39                     | 113                     | 40                      |            |
| <b>CD3<sup>+</sup>CD4<sup>+</sup>CD45RO<sup>+</sup> cells</b> |                      |                        |                         |                         |            |
| Low density (n=302)                                           | 26                   | 52                     | 148                     | 76                      | 0.60       |
| Intermediate density (n=304)                                  | 28                   | 47                     | 167                     | 62                      |            |
| High density (n=301)                                          | 22                   | 55                     | 162                     | 62                      |            |
| <b>CD3<sup>+</sup>CD4<sup>+</sup>CD45RO<sup>-</sup> cells</b> |                      |                        |                         |                         |            |
| Low density (n=365)                                           | 31                   | 64                     | 190                     | 80                      | 0.69       |
| Intermediate density (n=270)                                  | 22                   | 37                     | 146                     | 65                      |            |
| High density (n=272)                                          | 23                   | 53                     | 141                     | 55                      |            |

|                                                               | 0 cups/day<br>(N=76) | <1 cups/day<br>(N=154) | 1-3 cups/day<br>(N=478) | ≥3 cups/ day<br>(N=200) | <i>P</i> * |
|---------------------------------------------------------------|----------------------|------------------------|-------------------------|-------------------------|------------|
| <b>CD3<sup>+</sup>CD8<sup>+</sup>CD45RO<sup>+</sup> cells</b> |                      |                        |                         |                         |            |
| Low density (n=383)                                           | 32                   | 74                     | 185                     | 92                      | 0.29       |
| Intermediate density (n=262)                                  | 18                   | 40                     | 147                     | 57                      |            |
| High density (n=262)                                          | 26                   | 40                     | 145                     | 51                      |            |
| <b>CD3<sup>+</sup>CD8<sup>+</sup>CD45RO<sup>-</sup> cells</b> |                      |                        |                         |                         |            |
| Low density (n=503)                                           | 37                   | 94                     | 254                     | 118                     | 0.048      |
| Intermediate density (n=202)                                  | 19                   | 32                     | 121                     | 30                      |            |
| High density (n=202)                                          | 20                   | 28                     | 102                     | 52                      |            |

\* Chi-square test was performed.
